# Supplementary material for: The Spatio-Temporal Onset Characteristics of Indian Summer Monsoon Rainfall and Their Relationship with Climate Indices
Source: MDPI journal article supplement (doi:10.3390/atmos13101581), 2022-09-28
Supplement: s1 [file s1]

# Supplementary Materials: The Spatio-Temporal Onset Characteristics of Indian Summer Monsoon Rainfall and Their Relationship with Climate Indices

Atul Saini <sup>1,2</sup>, Netrananda Sahu <sup>1,\*</sup>, Saroj K. Mishra<sup>3</sup>, Shipra Jain <sup>4</sup>, Swadhin Behera <sup>5</sup> and Sushil K. Dash<sup>3</sup>

**Table S1.** Years of different climate modes as well as flood and drought from 1951–2017.

| Climate Mode | Years                                                                                          |
|--------------|------------------------------------------------------------------------------------------------|
| La Niña      | 1954, 1955 ,1970 ,1973 ,1975 ,1988 ,1999 ,2000 ,2007 ,2010 ,2011                               |
| El Niño      | 1951, 1957, 1965, 1968, 1972, 1976, 1987, 1997, 2002, 2006, 2009, 2015                         |
| Positive IOD | 1961,1963, 1983, 1994, 2012                                                                    |
| Negative IOD | 1960, 1964, 1974, 1981, 1989, 1992, 1996, 1998, 2014, 2016                                     |
| Flood        | 1956, 1959 ,1961 ,1970 ,1975 ,1983 ,1988 ,1994                                                 |
| Drought      | 1951, 1965, 1966, 1968, 1972, 1974, 1979, 1982, 1985, 1986, 1987, 2002, 2004, 2009, 2014, 2015 |
